# Supplementary material
Source: Research Square preprint supplement (doi:10.21203/rs.3.rs-8865567/v1)
Supplement: Supplementary file 1 [file 92d9cff09b8bc36d53f2eccf.xlsx]

## Sheet: Sheet1
性别	BMI	年龄	高血压	糖尿病	吸烟	高脂血症	FAI	冠脉夹角	高危斑块
Female	25.5	31	0	0	0	0	-83	73	0
Female	24.8	62	1	0	1	1	-83	77	1
Female	27.5	40	1	0	1	0	-94	22	0
Female	22.9	61	1	1	1	1	-71	50	0
Female	26.9	76	1	1	0	0	-68	66	1
Female	26.9	53	0	0	0	1	-87	84	0
Female	25.8	36	0	0	1	0	-95	78	0
Male	23.53	69	1	1	0	1	-87	80	0
Female	22.34	51	0	0	0	1	-84	18	0
Female	25.45	61	0	0	0	0	-87	41	0
Male	25.1	39	0	1	0	0	-76	51	0
Male	23.42	45	1	1	0	1	-80	79	1
Female	25.5	57	0	0	0	0	-89	58	0
Male	24.8	73	1	1	0	1	-72	82	1
Female	23.5	65	1	1	0	1	-73	61	0
Female	26.9	61	0	0	0	0	-75	95	0
Male	27.9	60	1	0	1	1	-80	86	1
Female	26.9	61	0	0	0	0	-66	78	0
Female	25.8	52	0	0	1	0	-82	88	0
Male	25.53	71	1	1	0	1	-71	67	1
Female	22.34	49	0	0	0	0	-86	77	0
Female	25.45	68	0	0	1	1	-65	82	0
Female	27.1	66	1	1	1	1	-66	92	0
Female	23.42	34	0	0	0	0	-79	72	0
Male	25.5	64	1	1	0	1	-76	90	1
Male	25.8	51	1	0	1	1	-70	102	1
Female	23.5	63	1	1	0	0	-74	63	0
Male	23.9	44	0	0	1	0	-86	69	0
Female	23.9	65	0	0	1	1	-83	42	0
Female	26.9	60	1	1	0	1	-81	62	0
Female	25.8	68	0	0	0	0	-75	69	0
Female	26.53	62	1	0	1	1	-65	71	1
Male	27.34	54	0	0	0	1	-76	122	1
Female	25.45	55	1	0	1	0	-88	58	0
Female	23.1	48	0	0	0	0	-81	63	0
Male	25.42	75	0	1	0	1	-67	88	1
Female	25.5	78	1	1	0	1	-60	57	1
Female	24.8	58	1	0	0	0	-66	100	1
Male	27.5	80	1	1	0	0	-68	74	1
Male	23.9	42	0	0	0	1	-83	89	0
Male	22.9	58	0	0	0	1	-87	102	0
Male	26.9	61	1	0	0	0	-85	52	0
Female	25.8	74	0	0	1	1	-66	101	1
Female	26.53	60	1	1	1	1	-71	82	1
Male	27.34	74	0	0	1	0	-70	99	1
Female	25.45	63	0	1	0	0	-82	58	0
Male	27.1	55	1	0	0	0	-72	72	1
Female	23.42	54	0	0	1	0	-69	95	1
Female	25.5	47	1	1	0	1	-94	77	0
Female	24.8	55	0	1	0	0	-77	61	1
Male	21.5	67	1	0	0	0	-79	112	0
Female	23.9	63	1	0	0	1	-77	57	0
Male	22.9	59	0	1	1	0	-73	64	0
Male	26.9	58	0	0	0	1	-75	29	0
Female	25.8	50	0	1	0	0	-66	118	1
Male	23.53	60	1	1	0	1	-63	125	1
Female	27.34	73	0	1	1	0	-69	72	1
Female	25.45	58	1	1	0	1	-73	65	0
Male	27.1	50	1	0	0	1	-63	57	0
Male	24.42	51	0	1	0	1	-67	70	1
Female	25.5	46	0	1	0	0	-66	80	1
Female	24.8	71	0	1	0	1	-68	50	1
Male	27.5	39	0	0	1	1	-71	72	0
Female	23.9	55	0	1	1	0	-77	35	0
Male	22.9	74	1	0	1	1	-75	84	0
Male	26.9	43	1	0	1	0	-76	63	0
Male	25.8	78	0	0	0	0	-72	84	1
Female	23.53	73	0	0	0	1	-74	65	0
Male	27.34	49	0	0	1	1	-66	80	1
Male	25.45	55	1	0	0	0	-71	123	1
Female	23.1	66	1	1	1	0	-75	97	0
Male	25.42	71	0	0	1	1	-77	66	0
Male	25.5	51	1	1	1	1	-76	75	0
Female	24.8	46	1	0	0	1	-70	74	0
Male	27.5	67	0	0	1	1	-81	38	0
Female	23.9	61	0	0	0	0	-72	95	1
Male	22.9	28	1	0	1	1	-76	81	1
Male	26.9	62	0	0	1	0	-65	85	1
Female	25.8	76	1	0	0	0	-80	63	1
Female	23.53	59	0	1	1	0	-73	49	0
Female	27.34	75	0	1	0	0	-69	75	1
Male	25.45	44	1	0	0	1	-85	82	1
Male	27.1	67	1	1	1	1	-70	66	1
Female	23.42	71	0	1	1	0	-78	68	0
Female	22.5	70	0	1	1	0	-69	67	1
Female	24.8	57	1	0	0	0	-76	55	0
Male	27.5	33	1	1	0	1	-71	78	0
Female	23.9	73	0	1	0	0	-75	74	0
Female	22.9	76	0	0	1	1	-65	75	1
Male	26.9	56	1	0	1	0	-59	66	1
FEMale	25.8	39	0	0	0	1	-73	58	0
Female	23.53	41	0	0	1	0	-72	86	1
Female	27.34	72	1	1	0	1	-65	50	0
Male	25.45	44	0	0	1	0	-78	65	0
Female	27.1	48	1	0	0	1	-68	67	0
Female	23.42	47	0	0	1	1	-67	40	1
Female	25.67	71	0	1	1	0	-62	73	1
Male	26.42	41	1	0	0	0	-72	75	0
Male	24.12	56	0	0	0	0	-60	81	0
Female	25.45	65	0	0	1	1	-79	89	0
Female	26.34	55	1	1	0	1	-81	56	1
Female	25.87	45	0	0	1	0	-61	61	0
Male	26.34	55	1	1	0	1	-81	56	1
Female	25.87	45	0	0	1	0	-61	61	0
Male	26.34	55	1	1	0	1	-81	45	1
Female	25.87	45	0	1	1	1	-61	61	0
